# Supplementary material for: Wireless optogenetics protects against obesity via stimulation of non-canonical fat thermogenesis
Source: PubMed Central journal article supplement (PMC7138828; doi:10.1038/s41467-020-15589-y), 2020-04-07
Supplement: 41467_2020_15589_MOESM1_ESM.pdf [file 41467_2020_15589_MOESM1_ESM.pdf]

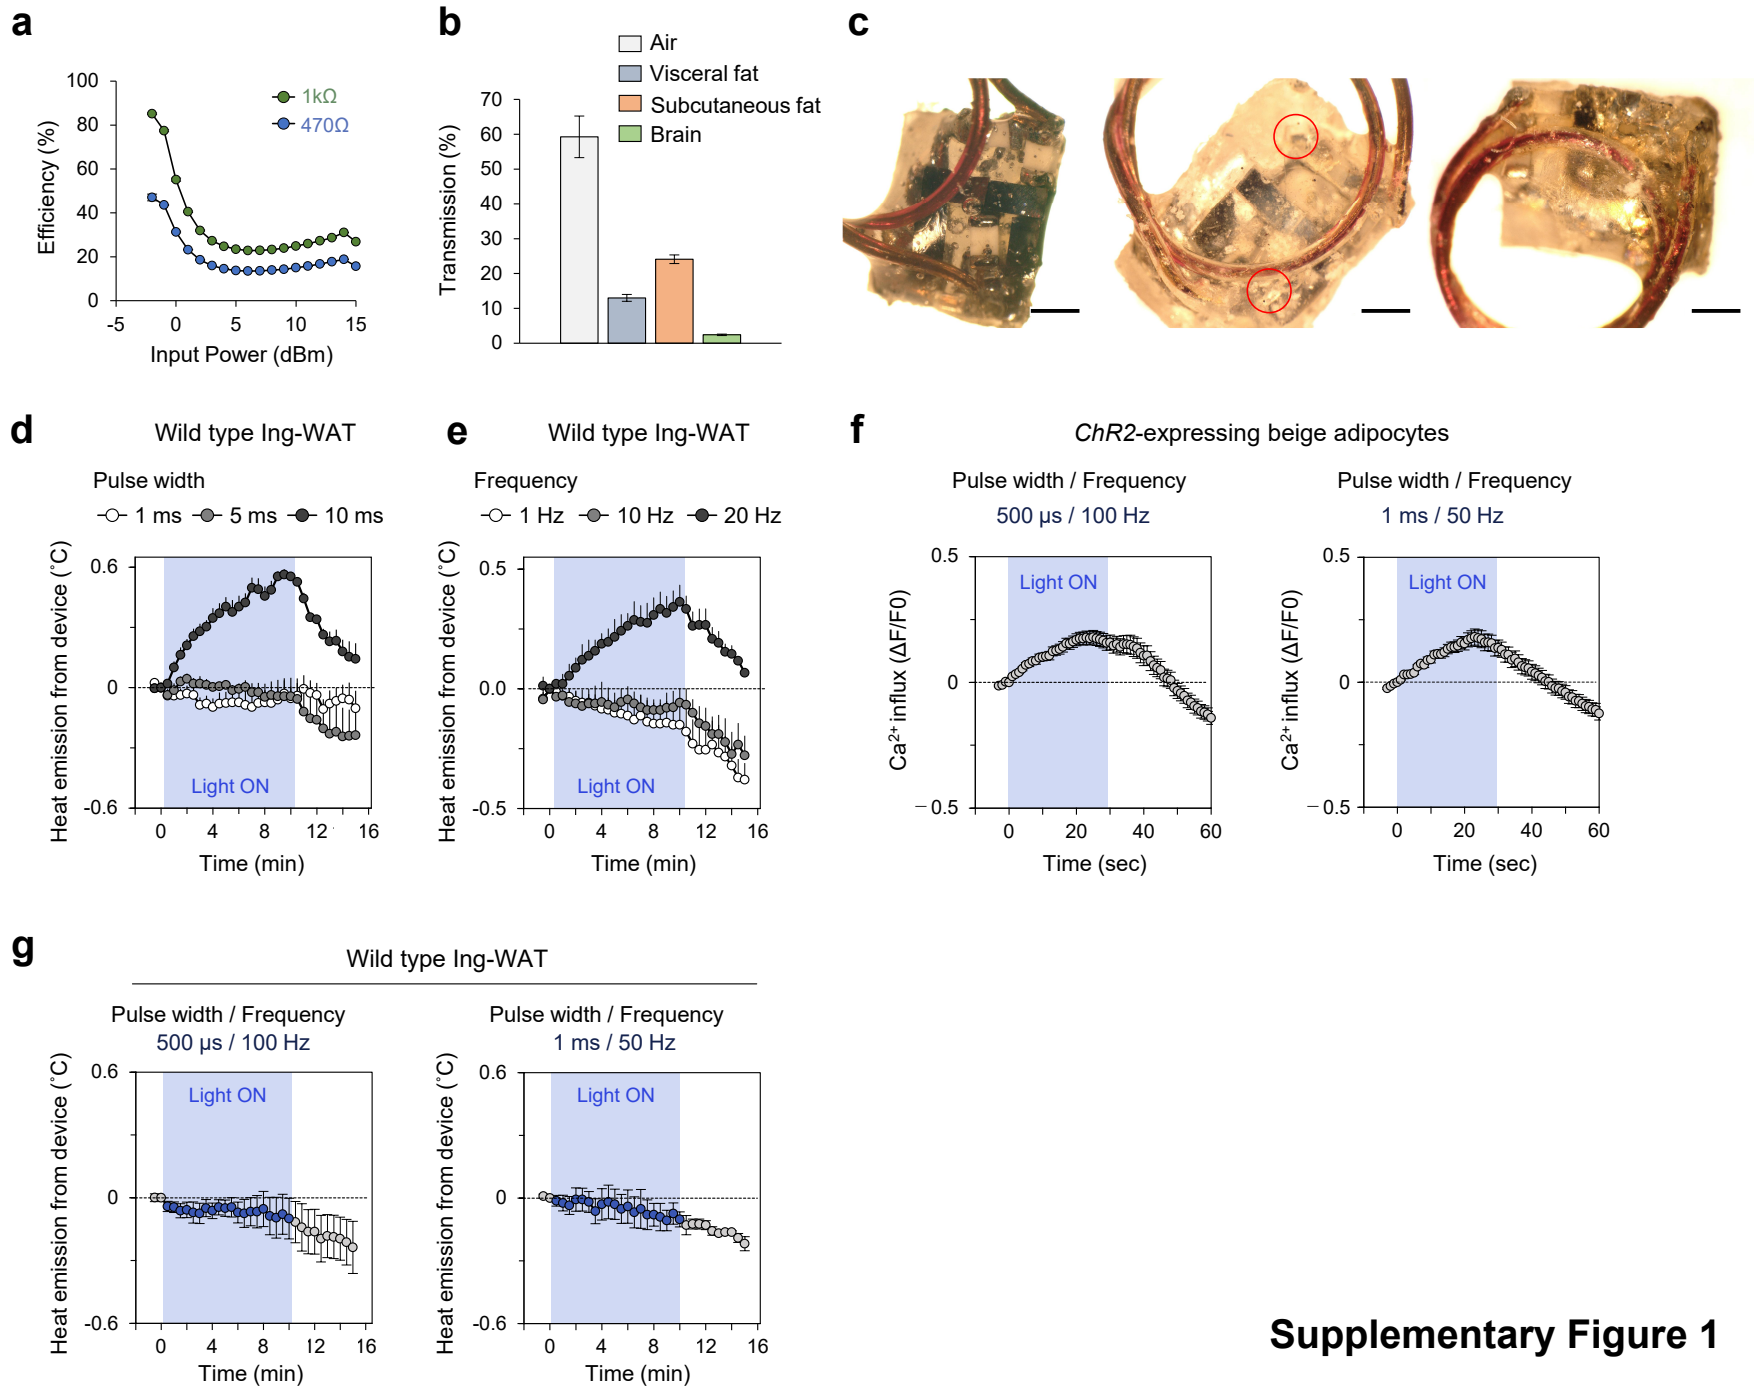

Supplementary Figure 1

**Supplementary Figure 1. Optimization of light stimulation by the wireless optogenetic implant.**

**a.** Rectifier efficiency versus input power for two loading conditions. n=3. **b.** Optical properties of the adipose tissues and brain. Based on this data, the attenuation coefficients were calculated (Adipose tissue,  $\mu'_s=0.8 \text{ mm}^{-1}$ ; Brain,  $\mu'_s=1.6 \text{ mm}^{-1}$ ). n=3. **c.** Demonstrates the degradation of the encapsulated implant in 20 mM Hydrogen Peroxide at 60 °C. Epoxy coating before submerging in hydrogen peroxide solution (left panel). Epoxy coating without Parylene C after 5 days in solution. Red circles represent some intrusion of liquid (middle panel). No intrusion of liquid under epoxy coating with Parylene C after 5 days in solution. (right panel). **d.** Heat emission from the device following optogenetic light stimulations with indicated pulse width. n=5. **e.** Heat emission from the device following optogenetic light stimulations with indicated pulse frequency. Mice stimulated with 10-Hz frequency, n=3; with 1-Hz or 20-Hz frequencies, n=4. **f.** Real-time intracellular  $\text{Ca}^{2+}$  influx changes following optogenetic light stimulation with indicated pulse width and frequency. Cells stimulated with 500- $\mu\text{s}$  pulse width and 100-Hz frequency, n=90; with 1-ms pulse width and 50-Hz frequency, n=105. **g.** Heat emission from device following optogenetics light stimulation with indicated pulse width and frequency. Mice stimulated with 500- $\mu\text{s}$  pulse width and 100-Hz frequency, n=4; with 1-ms pulse width and 50-Hz frequency, n=3. All Data are expressed as means  $\pm$  s.e.m.

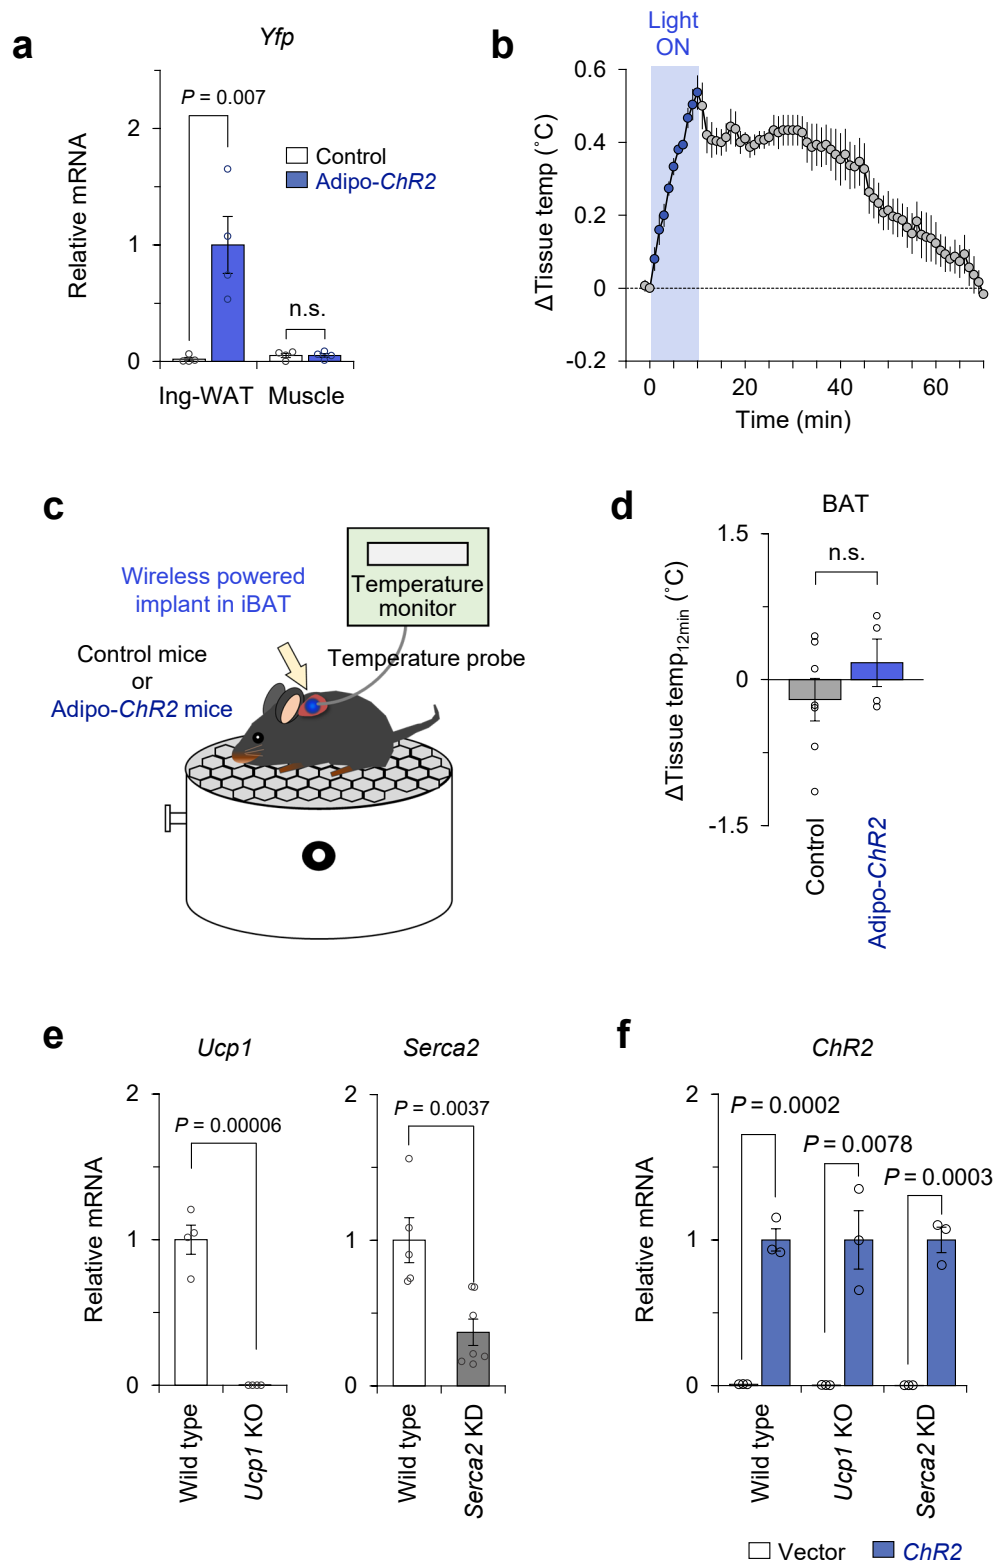

Supplementary Figure 2

**Supplementary Figure 2. Characterization of Adipo-ChR2 mice.**

**a.** mRNA expression of *Yfp* in the inguinal WAT and skeletal muscle of Adipo-ChR2 and littermate controls. mRNA expression relative to *36B4*. n=4. **b.** Real-time changes in the inguinal WAT temperature of Adipo-ChR2 mice following optogenetics light stimulation. n=5. **c.** Schematic illustration of the iBAT temperature recording following optogenetic light stimulation. **d.** Quantification of light-stimulated iBAT thermogenesis of Adipo-ChR2 and littermate controls in (c). Control, n=7; Adipo-ChR2, n=4. **e.** mRNA expression of *Ucp1* (left) and *Serca2* (right) in the indicated beige adipocytes. mRNA expression relative to *36B4*. *Ucp1*; Wild-type, n=4; *Ucp1* KO, n=4; *Serca2*; Wild-type, n=5; *Serca2*KD, n=7. **f.** mRNA expression of *ChR2* in indicated beige adipocytes. mRNA expression relative to *36B4*. n=3. Data were analyzed by unpaired two-sided *t*-test (a, d, and e-f). All Data are expressed as means  $\pm$  s.e.m. n.s., not significant.



**a**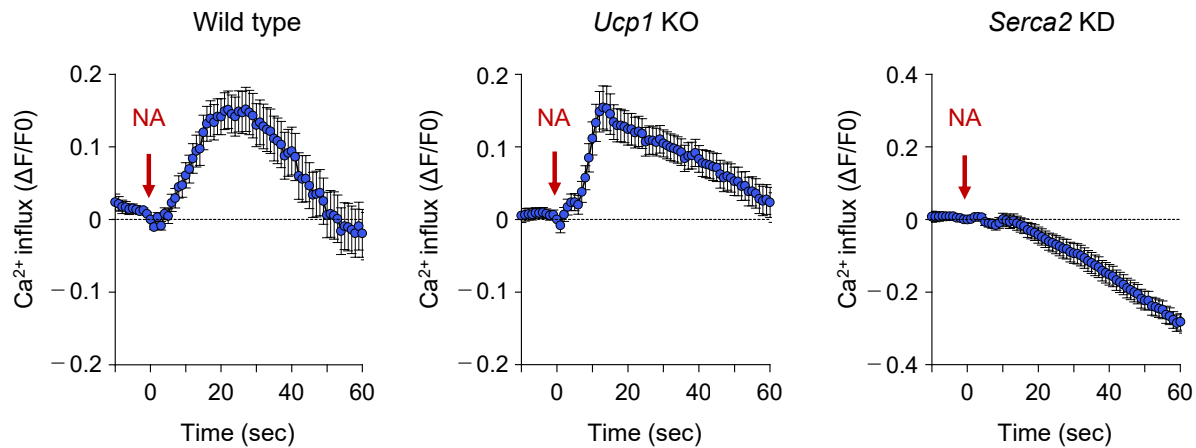**b**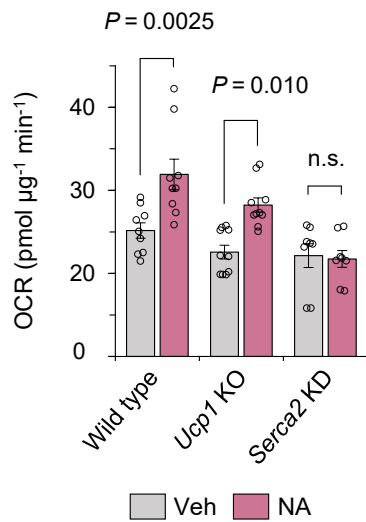**c**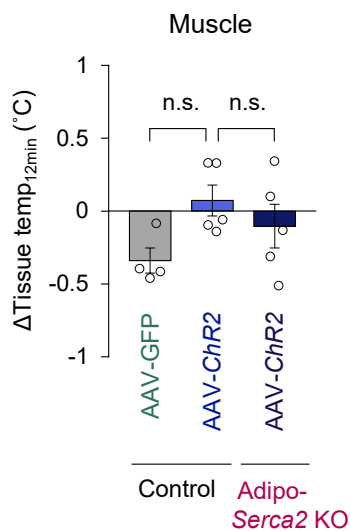**d**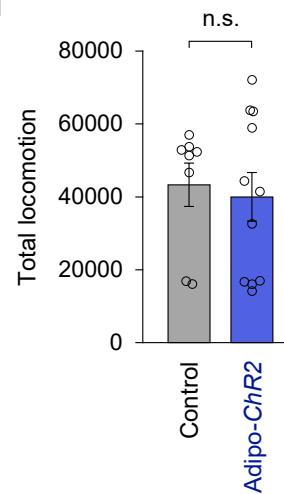

**Supplementary Figure 3. The requirement of SERCA2 for adipose tissue thermogenesis.**

**a.** Real-time changes in intracellular  $\text{Ca}^{2+}$  influx in wild-type (left), *Ucp1* KO (middle), and *Serca2* depleted beige adipocytes (right) in response to noradrenaline (NA) treatment (shown by red arrows). Wild-type, n=85; *Ucp1* KO, n=70; *Serca2*KD, n=85. **b.** Oxygen consumption rate (OCR) in wild-type, *Ucp1* KO, and *Serca2* depleted beige adipocytes. Wild-type, n=9 for both groups; *Ucp1* KO, n=10 for both groups; *Serca2*KD, n=8 for both groups. **c.** Quantification of light-stimulated thermogenesis in the skeletal muscle of the indicated mice. Control with AAV-GFP, n=4; Control with AAV-*ChR2*, n=5; Adipo- *Serca2* KO with AAV-*ChR2*, n=5. **d.** Locomotor activity of Adipo-*ChR2* mice and littermate controls. All mice were stimulated with optogenetics wireless implant at 10 Hz with a 5-ms pulse width for 10 min per day. Control, n=8; Adipo-*ChR2*, n=11. Data were analyzed by two-way ANOVA (b) or one-way ANOVA (c) by Tukey's post hoc test, or unpaired two-sided *t*-test (d). All Data are expressed as means  $\pm$  s.e.m. n.s., not significant.

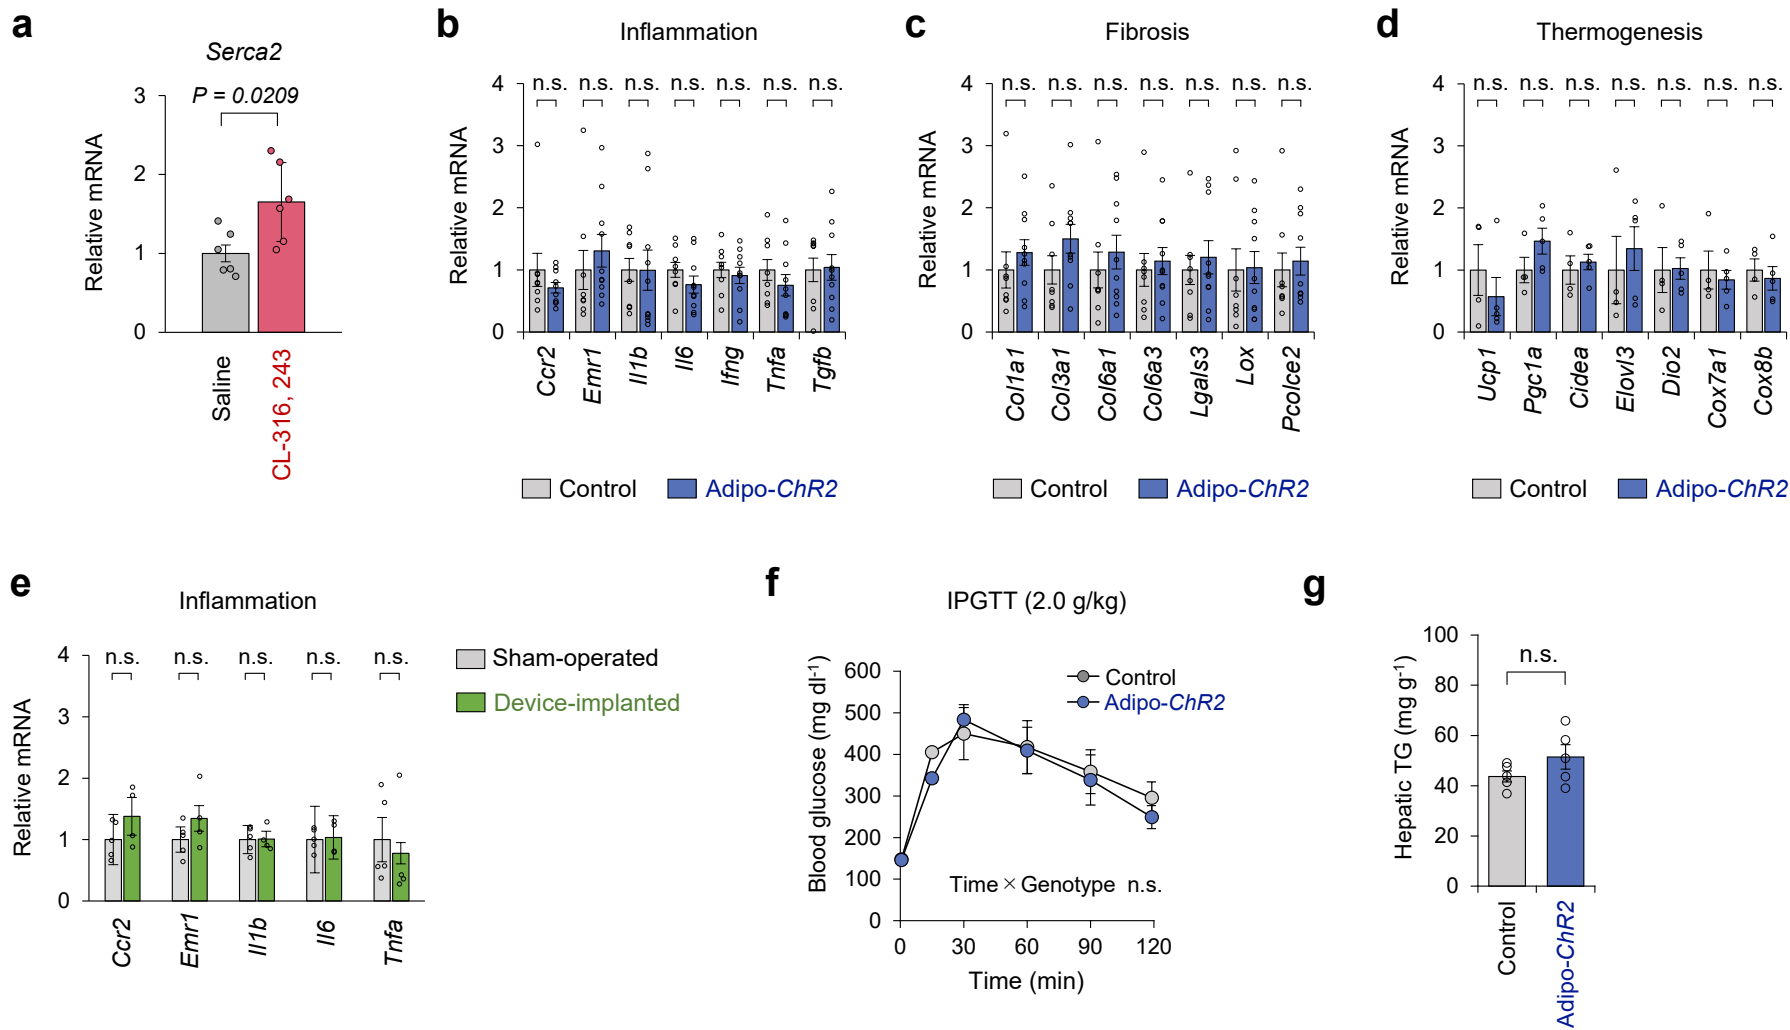

Supplementary Figure 4

**Supplementary Figure 4. The effect of optogenetic stimulation on adipose tissues.**

**a.** mRNA expression of *Serca2* in the inguinal WAT of wild-type mice following CL-316, 243 treatment. The mice at 10 weeks old were treated with saline or CL-316, 243 at 1 mg kg<sup>-1</sup> for 5 days. mRNA expression relative to *36B4*. n=6. **b-d.** mRNA expression of pro-inflammatory genes (b), pro-fibrosis genes (c), and thermogenesis genes (d) in the inguinal WAT of Adipo-*ChR2* mice and littermate controls. mRNA expression was relative to *36B4*. Control, n=8 for inflammation genes and fibrosis genes, n=4 for thermogenesis genes; Adipo-*ChR2*, n=10 for inflammation genes and fibrosis genes, n=5 for thermogenesis genes. **e.** mRNA expression of pro-inflammatory genes in the inguinal WAT of mice that received wireless optogenetic devices or sham-operated mice. Fourteen days after sham operation or implanted operation, the inguinal WAT was harvested. Sham-operated, n=5; Device-implanted, n=4. mRNA expression was relative to *36B4*. **f.** Glucose tolerance test in Adipo-*ChR2* mice and littermate controls. Mice received optogenetic light stimulation at 10 Hz with a 5-ms pulse width for 10 min for 19 days on a HFD. n=5. **g.** Liver triglyceride contents in Adipo-*ChR2* mice and littermate controls. n=5. Data were analyzed by unpaired two-sided *t*-test (a-e, and g) or two-way repeated-measures ANOVA (f). All Data are expressed as means ± s.e.m. n.s., not significant.

**Supplementary Table 1. Primer sequences used for quantitative RT-PCR.**

| <b>Gene</b>    | <b>Forward</b>          | <b>Reverse</b>             |
|----------------|-------------------------|----------------------------|
| <i>Ccr2</i>    | ATCCACGGCATACTATCAACATC | TCGTAGTCATACGGTGTGGTG      |
| <i>ChR2</i>    | CAATGTTACTGTGCCGGATG    | ATTTCAATGGCGCACACATA       |
| <i>Cidea</i>   | ATCACAACTGGCCTGGTTACG   | TACTACCCGGTGTCCATTTCT      |
| <i>Col1a1</i>  | GCTCCTCTTAGGGGCCACT     | CCACGTCTCACCATTGGGG        |
| <i>Col3a1</i>  | CTGTAACATGGAACTGGGGAAA  | CCATAGCTGAACTGAAAACCACC    |
| <i>Col6a1</i>  | CTGCTGCTACAAGCCTGCT     | CCCATAAGGTTTCAGCCTCA       |
| <i>Col6a3</i>  | GCTGCGGAATCACTTTGTGC    | CACCTTGACACCTTTCTGGGT      |
| <i>Cox7a1</i>  | CAGCGTCATGGTCAGTCTGT    | AGAAAACCGTGTGGCAGAGA       |
| <i>Cox8b</i>   | GAACCATGAAGCCAACGACT    | GCGAAGTTCACAGTGGTTCC       |
| <i>Dio2</i>    | CAGTGTGGTGCACGTCTCCAATC | TGAACCAAAGTTGACCACCAG      |
| <i>Elovl3</i>  | TCCGCGTTCTCATGTAGGTCT   | GGACCTGATGCAACCCTATGA      |
| <i>Emr1</i>    | CTTGGCTATGGGCTTCCAGTC   | GCAAGGAGGACAGAGTTTATCGTG   |
| <i>Ifng</i>    | ACAGCAAGGCGAAAAAGGATG   | TGGTGGACCACTCGGATGA        |
| <i>Il1b</i>    | ATGCCACCTTTTGACAGTGAT   | AGCCCTTCATCTTTTGGGGT       |
| <i>Il6</i>     | CCCCAATTTCCAATGCTCTCC   | GGATGGTCTTGGTCCTTAGCC      |
| <i>Lgals3</i>  | TGCTGGTTCAGGGACTCAA     | CCACCGGCCTCTGTAGAAGA       |
| <i>Lox</i>     | CAGCCACATAGATCGCATGGT   | GCCGTATCCAGGTCGGTTC        |
| <i>Pcolce2</i> | TGTGGCGGCATTCTTACCG     | CCCTCAGGAAGTGTGATTTTCCA    |
| <i>Pgc1a</i>   | AGCCGTGACCACTGACAACGAG  | GCTGCATGGTCTGAGTGCTAAG     |
| <i>Serca2</i>  | TCGACAGGACAGAAAGAGTGTG  | AAACTGAATTCAACTCACCAGC     |
| <i>Tgfb</i>    | CTCCCGTGGCTTCTAGTGC     | GCCTTAGTTTGGACAGGATCTG     |
| <i>Tnfa</i>    | ATGGCCTCCCTCTCATCAGT    | TTTGCTACGACGTGGGCTAC       |
| <i>Ucp1</i>    | CACCTTCCCGCTGGACACT     | CCCTAGGACACCTTTATACCTAATGG |
| <i>Yfp</i>     | AGCTGAAGGGCATCGACTTC    | AGCAGGACCATGTGATCGC        |
| <i>36B4</i>    | TCCAGGCTTTGGGCATCA      | CTTTATCAGCTGCACATCACTCAGA  |
